# Supplementary material for: Meisosomes, folded membrane microdomains between the apical extracellular matrix and epidermis
Source: eLife. 2023 Mar 13;12:e75906. doi: 10.7554/eLife.75906 (PMC10010689; doi:10.7554/eLife.75906)
Supplement: Figure 6—source data 1. — Using different VHA-5 reporter strains in wild-type and different collagen RNA inactivation or mutants, VHA-5-positive objects were segmented and three parameters were quantified, average size, Feret’s diameter and density; the number of worms, total surface analysed per condition are presented, together with statistical analysis (see ‘Materials and methods’ for details). [file elife-75906-fig6-data1.xlsx]

## Sheet: VHA-5GFP objets
					Average size (µm2)			Feret’s diameter (µm)			Density (count/µm2)
VHA-5::GFP strain	Inactivation	Gene	Number of worm	Total area analysed (µm2)	Mean	Standard deviation	P value	Mean	Standard deviation	P value	Mean	Standard deviation	P value
Ex	RNAi	sta-1	19	7679	1.51	0.415		2.01	0.305		0.16	0.029
Ex	RNAi	dpy-4	22	12200	1.67	0.513	0.4336	1.99	0.335	0.5483	0.13	0.029	0.493
Ex	RNAi	dpy-5	24	11980	1.48	0.462	0.8211	1.88	0.357	0.24	0.13	0.021	0.0212
Ex	RNAi	dpy-3	12	21686	0.62	0.159	<0,0001	1.19	0.13	<0,0001	0.2	0.047	0.002
Ex	RNAi	dpy-7	17	30871	0.57	0.14	<0,0001	1.17	0.132	<0,0001	0.24	0.066	0.0002
Ex	RNAi	sta-1	18	28492	1.4	0.51		1.8	0.28		0.11	0.02
Ex	RNAi	dpy-13	18	22277	1.2	0.16	0.7193	1.7	0.13	0.7968	0.11	0.02	0.389
Ex	RNAi	dpy-3	18	21686	0.7	0.15	<0,0001	1.2	0.13	<0,0001	0.22	0.04	<0,0001
Ex	RNAi	dpy-7	20	30871	0.6	0.13	<0,0001	1.2	0.1	<0,0001	0.19	0.03	<0,0001
Ex	wild-type	wt	18	5739	1.75	0.62		2	0.4		0.15	0.04
Ex	mutant	dpy-3	20	28154	0.59	0.08	<0,0001	1.1	0.08	<0,0001	0.24	0.03	<0,0001
Si	RNAi	sta-1	17	17948.3	1.36	0.2697		1.833	0.1778		0.08576	0.02341
Si	RNAi	dpy-4	11	8980.77	1.535	0.3222	0.339	1.866	0.231	0.9993	0.07387	0.01597	0.7602
Si	RNAi	dpy-5	10	8575.49	1.501	0.2263	0.629	1.872	0.1447	0.9968	0.07369	0.01173	0.7727
Si	RNAi	dpy-13	11	17363.6	1.495	0.4221	0.643	1.776	0.2765	0.9728	0.08381	0.01981	0.9997
Si	RNAi	dpy-2	11	13196.8	0.866	0.1243	<0,001	1.41	0.1192	<0,0001	0.1917	0.03247	<0,0001
Si	RNAi	dpy-3	10	13983	0.7602	0.223	<0,001	1.359	0.1856	<0,0001	0.1354	0.03543	<0,0001
Si	RNAi	dpy-7	14	15877.3	0.9639	0.233	<0,001	1.509	0.1947	<0,0001	0.1251	0.02177	<0,0001
Si	RNAi	dpy-8	13	15969.6	0.8928	0.1221	<0,001	1.443	0.08847	<0,0001	0.1655	0.0254	<0,0001
Si	RNAi	dpy-9	13	14472.4	0.8162	0.09245	<0,001	1.373	0.07715	<0,0001	0.1532	0.01963	<0,0001
Si	RNAi	dpy-10	11	16280.4	0.7501	0.146	<0,001	1.296	0.1288	<0,0001	0.1813	0.02009	<0,0001
