# Supplementary material for: Meisosomes, folded membrane microdomains between the apical extracellular matrix and epidermis
Source: eLife. 2023 Mar 13;12:e75906. doi: 10.7554/eLife.75906 (PMC10010689; doi:10.7554/eLife.75906)
Supplement: Table 1—source data 1. [file elife-75906-table1-data1.xlsx]

## Sheet: Meisosomes lenght TEM in micron
wt (T)	wt (L)	dpy-13 (T)	dpy-13 (L)	dpy-2 (L)	dpy-2 (T)	dpy-3 (L)	dpy-7 (T)	dpy-7 (L)
0.2	0.1	0.3	0.2	0.05	0.1	0.1	0.05	0.1
0.2	0.2	0.3	0.3	0.1	0.1	0.15	0.05	0.1
0.2	0.2	0.3	0.4	0.15	0.15	0.2	0.05	0.15
0.3	0.2	0.3	0.5	0.15	0.3	0.2	0.1	0.15
0.3	0.2	0.4	0.8	0.15	0.4	0.2	0.1	0.15
0.4	0.2	0.4	1	0.15	0.6	0.3	0.1	0.2
0.4	0.2	0.4	1.1	0.15		0.4	0.15	0.2
0.4	0.3	0.5	1.1	0.15		0.4	0.15	0.2
0.4	0.3	0.5	1.2	0.15		0.5	0.15	0.2
0.5	0.3	0.5	1.2	0.2		0.6	0.15	0.2
0.5	0.3	0.5	4	0.2		0.6	0.2	0.25
0.5	0.3	0.5		0.2		0.7	0.25	0.25
0.6	0.4	0.6		0.2		0.7	0.25	0.3
0.6	0.5	0.6		0.2		0.8	0.3	0.3
0.6	0.5	0.6		0.2		1	0.3	0.3
0.6	0.5	0.6		0.25		1	0.4	0.3
0.7	0.5	0.6		0.25			0.4	0.3
1	0.5	0.7		0.25			0.4	0.3
1	0.5	0.7		0.3			0.4	0.3
1.2	0.5	0.8		0.3			0.5	0.3
2.5	0.5	0.8		0.3			0.5	0.35
2.6	0.5	0.8		0.3			0.5	0.35
	0.5	0.8		0.3			0.6	0.4
	0.5	0.8		0.3			0.7	0.4
	0.6	0.9		0.35				0.4
	0.7	0.9		0.4				0.4
	0.9	1		0.4				0.4
	0.9	1		0.4				0.4
	1	1.2		0.45				0.5
	1	1.6		0.5				0.5
	1	4		0.5				0.5
	1			0.5				0.5
	1			0.5				0.6
	1.1			0.5				0.6
	1.2			0.5				0.6
	1.2			0.5				0.8
	1.4			0.5				1.5
	1.6			0.6
	1.6			0.6
	2.7			0.6
	4			0.7
				1
				1
				1
				1
